# Supplementary material
Source: PubMed Central journal article supplement (PMC7659559)
Supplement: mmc1.pdf [file mmc1.pdf]

**Cell Reports Medicine, Volume 1**

## **Supplemental Information**

### **Systems-Level Immunomonitoring from Acute to Recovery Phase of Severe COVID-19**

**Lucie Rodriguez, Pirkka T. Pekkarinen, Tadepally Lakshmikanth, Ziyang Tan, Camila Rosat Consiglio, Christian Pou, Yang Chen, Constantin Habimana Mugabo, Ngoc Anh Nguyen, Kirsten Nowlan, Tomas Strandin, Lev Levanov, Jaromir Mikes, Jun Wang, Anu Kantele, Jussi Hepojoki, Olli Vapalahti, Santtu Heinonen, Eliisa Kekäläinen, and Petter Brodin**

Suppl. Figure 1. Immune cell proportions in COVID-19 of ICU and recovered individuals, Related to Figure 3.

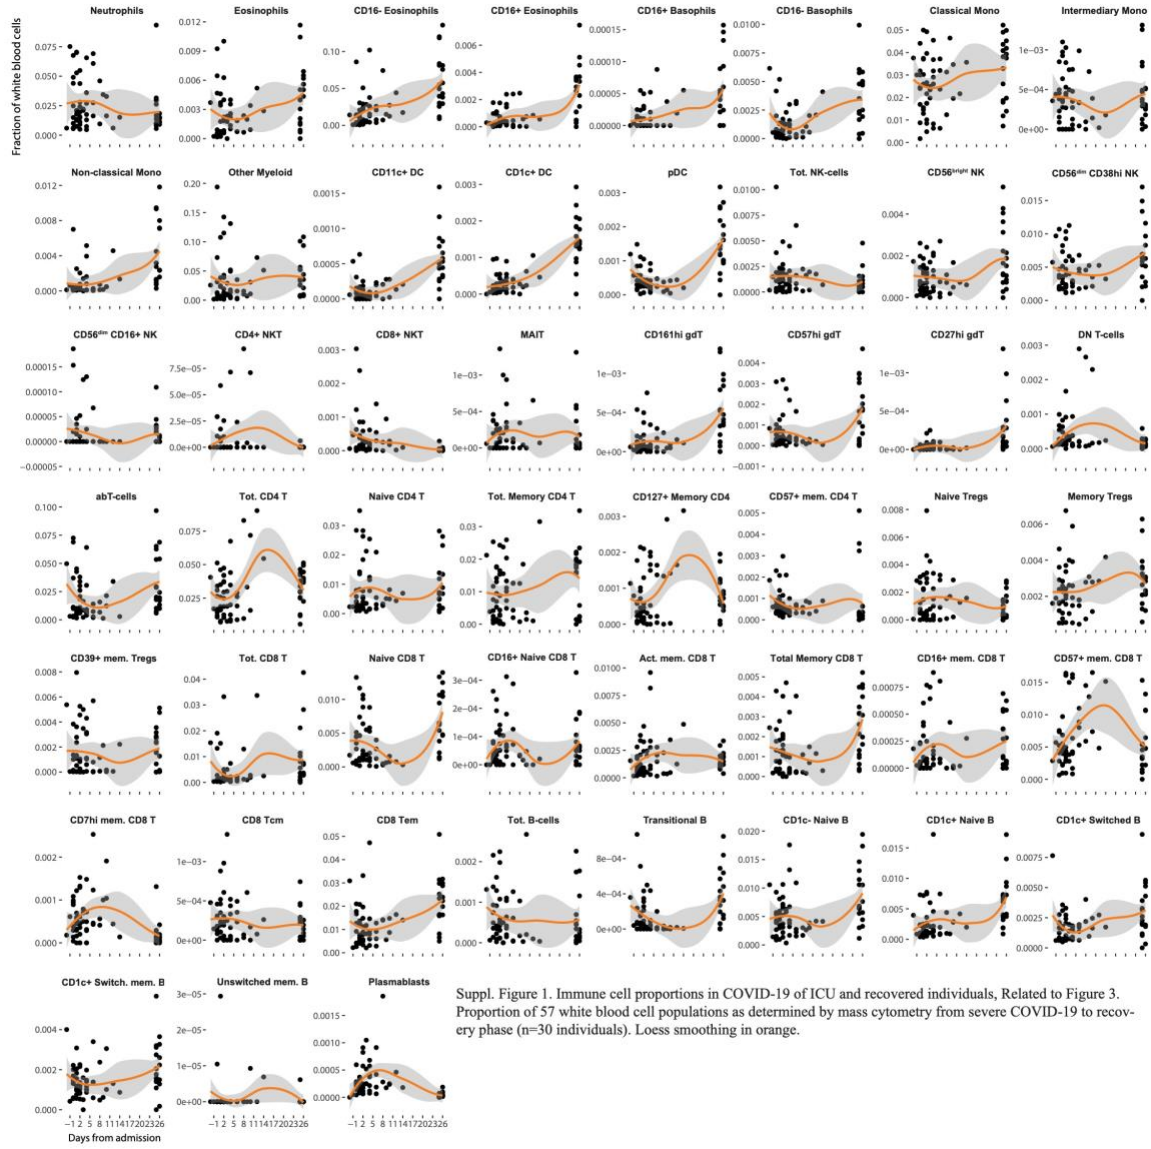

**Suppl. Figure 2. Immune cell proportions in COVID-19 of Non-ICU and recovered individuals, Related to Figure 3.**

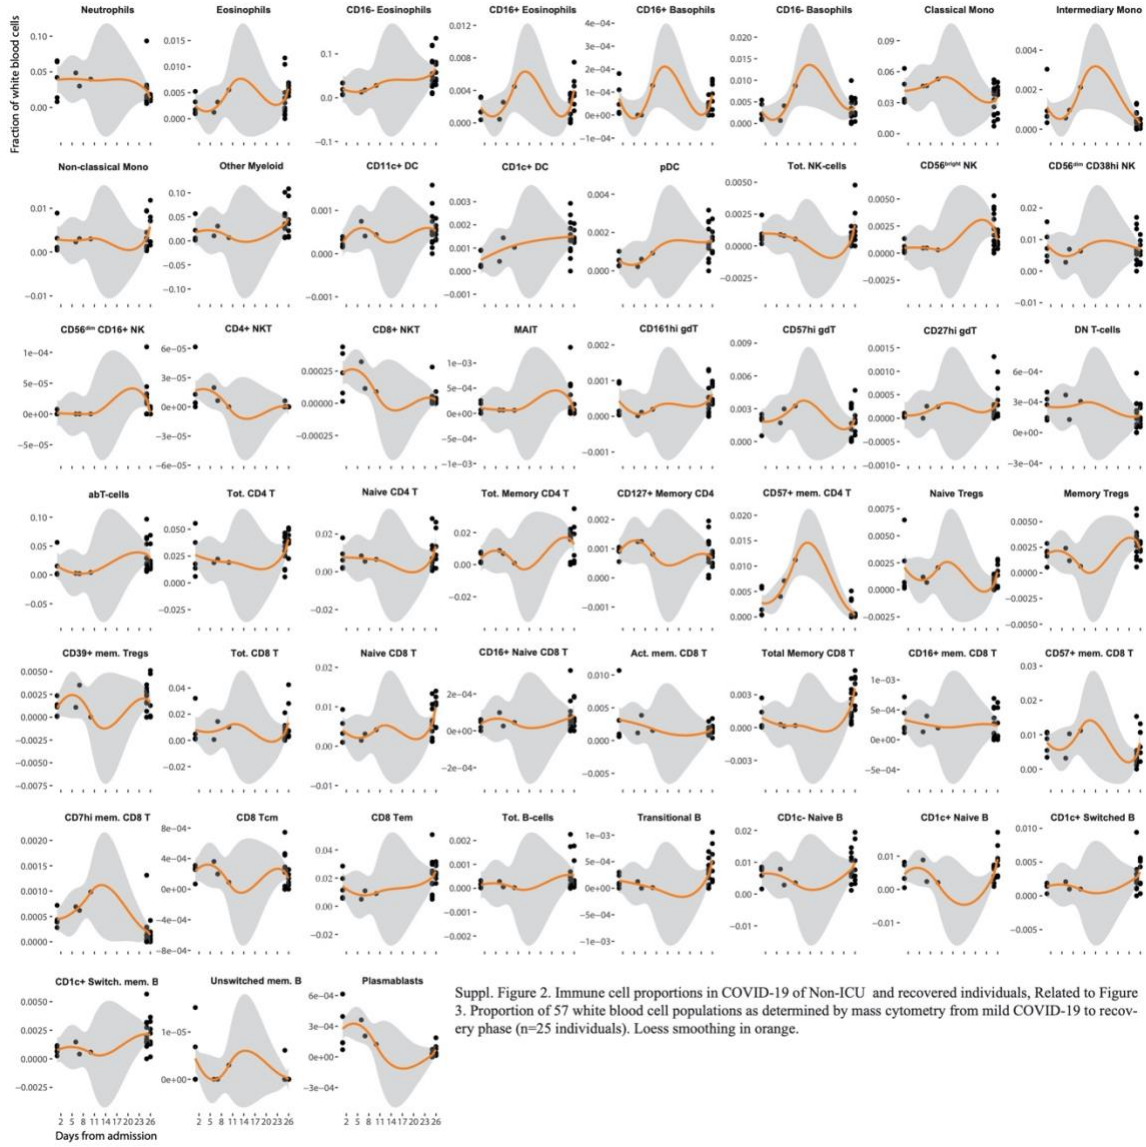

**Suppl. Table 1. IgG data, Related to STAR Methods.**

| <b>Sample ID</b>    | <b>Subject ID</b> | <b>IFA (inf. cells)</b> | <b>old-RBD</b> | <b>VE6-RBD</b> |
|---------------------|-------------------|-------------------------|----------------|----------------|
| CoV-24, serum, t1   | COV-24            | 320                     | 0.138          | 0.064          |
| CoV-24, heparin, t2 | COV-24            | 2570                    | 0.902          | 0.2025         |
| CoV-25, serum, t1   | COV-25            | 320                     | 0.219          | 0.0795         |
| CoV-25, EDTA, t2    | COV-25            | 1280                    | 0.533          | 0.118          |
| CoV-26, serum, t1   | COV-26            | 2560                    | 0.458          | 0.1015         |
| CoV-26, heparin, t2 | COV-26            | 2570                    | 0.866          | 0.163          |
| CoV-27, serum, t1   | COV-27            | 640                     | 0.666          | 0.1415         |
| CoV-27, heparin, t2 | COV-27            | 1280                    | 1.139          | 0.218          |
| CoV-28, serum, t1   | COV-28            | 640                     | 0.385          | 0.1            |
| CoV-29, serum, t1   | COV-29            | 160                     | 0.21           | 0.085          |
| CoV-29, heparin, t2 | COV-29            | 1280                    | 0.923          | 0.1865         |
| CoV-30, serum, t1   | COV-30            | 1280                    | 0.928          | 0.1895         |
| CoV-30, serum, t2   | COV-30            | 2570                    | 1.063          | 0.215          |
| CoV-31, serum, t1   | COV-31            | 320                     | 0.654          | 0.135          |
| CoV-31, serum, t2   | COV-31            | 640                     | 0.926          | 0.185          |
| CoV-32, serum, t1   | COV-32            | 80                      | 0.084          | 0.0645         |
| CoV-32, heparin, t2 | COV-32            | 1280                    | 0.45           | 0.1035         |
| CoV-33, serum, t1   | COV-33            | 80                      | 0.17           | 0.0685         |
| CoV-33, heparin, t2 | COV-33            | 640                     | 0.559          | 0.112          |
| CoV-34, EDTA, t1    | COV-34            | 10                      | 0.077          | 0.0625         |
| CoV-34, EDTA, t2    | COV-34            | 2560                    | 1.138          | 0.267          |
| CoV-34, EDTA, t3    | COV-34            | 2560                    | 1.035          | 0.237          |
| CoV-35, serum, t1   | COV-35            | 10                      | 0.073          | 0.06           |
| CoV-35, heparin, t2 | COV-35            | 2560                    | 0.672          | 0.141          |
| CoV-36, serum, t1   | COV-36            | 10                      | 0.061          | 0.057          |
| CoV-36, serum, t2   | COV-36            | 640                     | 0.485          | 0.117          |
| CoV-37, serum, t1   | COV-37            | 10                      | 0.075          | 0.0615         |
| CoV-37, heparin, t2 | COV-37            | 80                      | 0.086          | 0.063          |
| CoV-39, serum, t1   | COV-39            | 640                     | 0.277          | 0.081          |
| CoV-39, heparin, t2 | COV-39            | 640                     | 0.61           | 0.123          |
| CoV-40, serum, t1   | COV-40            | 1280                    | 0.084          | 0.065          |
| CoV-40, heparin, t2 | COV-40            | 2570                    | 0.909          | 0.2445         |
| CoV-40, EDTA, t3    | COV-40            | 2560                    | 0.869          | 0.216          |
| CoV-41, serum, t1   | COV-41            | 320                     | 0.081          | 0.0615         |

|                     |        |     |       |        |
|---------------------|--------|-----|-------|--------|
| CoV-41, heparin, t2 | COV-41 | 640 | 0.308 | 0.0985 |
|---------------------|--------|-----|-------|--------|

**Suppl. Table 2. Patient characteristics, Related to STAR Methods.**

| <b>Subject ID</b> | <b>Age</b> | <b>Sex</b> | <b>ICU status</b> | <b>Acute (A) or Recovery (R)</b> | <b>Treatments/Conditions</b> |
|-------------------|------------|------------|-------------------|----------------------------------|------------------------------|
| COV-3             | 35         | M          |                   | R                                |                              |
| COV-4             | 54         | F          |                   | R                                |                              |
| COV-5             | 56         | F          |                   | R                                |                              |
| COV-7             | 34         | M          |                   | R                                |                              |
| COV-8             | 50         | F          |                   | R                                |                              |
| COV-9             | 59         | F          |                   | R                                |                              |
| COV-10            | 57         | M          |                   | R                                |                              |
| COV-11            | 56         | F          |                   | R                                |                              |
| COV-13            | 61         | F          |                   | R                                |                              |
| COV-14            | 28         | F          |                   | R                                |                              |
| COV-15            | 32         | F          |                   | R                                |                              |
| COV-16            | 33         | M          |                   | R                                |                              |
| COV-17            | 35         | F          |                   | R                                |                              |
| COV-18            | 45         | F          |                   | R                                |                              |
| COV-19            | 46         | M          |                   | R                                |                              |
| COV-20            | 52         | M          |                   | R                                |                              |
| COV-21            | 34         | M          |                   | R                                |                              |
| COV-22            | 40         | M          |                   | R                                |                              |
| COV-23            | 32         | F          |                   | R                                |                              |
| COV-24            | 53         | F          | ICU               | A                                |                              |
| COV-25            | 40         | M          | Non-ICU           | A                                |                              |
| COV-26            | 77         | M          | ICU               | A                                |                              |
| COV-27            | 59         | F          | ICU               | A                                |                              |
| COV-28            | 52         | M          | Non-ICU           | A                                |                              |
| COV-29            | 58         | F          | ICU               | A                                |                              |
| COV-30            | 64         | F          | Non-ICU           | A                                |                              |
| COV-31            | 57         | F          | Non-ICU           | A                                |                              |
| COV-32            | 65         | F          | Non-ICU           | A                                |                              |
| COV-33            | 55         | M          | Non-ICU           | A                                |                              |
| COV-34            | 63         | M          | ICU               | A                                | CA/CPR/epinephrine           |
| COV-35            | 50         | M          | ICU               | A                                |                              |
| COV-36            | 61         | F          | Non-ICU           | A                                |                              |
| COV-37            | 62         | M          | ICU               | A                                |                              |
| COV-39            | 46         | F          | ICU               | A                                | Lactating                    |
| COV-40            | 69         | M          | ICU               | A                                |                              |
| COV-41            | 55         | F          | ICU               | A                                | Prior Oxychlorin treatment   |
| COV-43            | 66         | F          |                   | R                                |                              |
